# Supplementary material
Source: Research Square preprint supplement (doi:10.21203/rs.3.rs-8147801/v1)
Supplement: Supplementary file 1 [file 11b08a1dbb5340421f84f402.xlsx]

## Sheet: DEGs
SYMBOL	ENTREZID	GENENAME	Regulation	GENETYPE	baseMean	log2FoldChange	lfcSE	stat	pvalue	padj
FDCSP	260436	follicular dendritic cell secreted protein	Up in Responder	protein-coding	247.073	-5.8529	1.13498	-5.15682	2.51174e-07	0.00556551
ALDOB	229	aldolase, fructose-bisphosphate B	Up in Responder	protein-coding	19.5523	-2.982	0.719682	-4.1435	3.42043e-05	0.0306185
ADGRB1	575	adhesion G protein-coupled receptor B1	Up in Responder	protein-coding	93.496	-2.9668	0.605422	-4.90038	9.56502e-07	0.00707124
SPINK7	84651	serine peptidase inhibitor Kazal type 7	Up in Responder	protein-coding	20.7713	-2.53537	0.588363	-4.3092	1.6385e-05	0.0244599
SULT1E1	6783	sulfotransferase family 1E member 1	Up in Responder	protein-coding	61.8812	-2.48051	0.588127	-4.21764	2.4687e-05	0.0287903
PAK3	5063	p21 (RAC1) activated kinase 3	Up in Responder	protein-coding	113.269	-2.37406	0.568931	-4.17285	3.00815e-05	0.0306185
LTF	4057	lactotransferrin	Up in Responder	protein-coding	124.155	-2.35927	0.562363	-4.19528	2.72531e-05	0.0301938
SLFN14	342618	schlafen family member 14	Up in Responder	protein-coding	16.4771	-2.20248	0.552191	-3.98863	6.64564e-05	0.0471919
SLC25A53	401612	solute carrier family 25 member 53	Up in Responder	protein-coding	28.1828	-2.16498	0.505821	-4.28013	1.86784e-05	0.0258673
SLAMF6	114836	SLAM family member 6	Up in Responder	protein-coding	34.7172	-2.07539	0.505695	-4.10403	4.06012e-05	0.0333201
ACP3	55	acid phosphatase 3	Up in Responder	protein-coding	100.833	-1.10897	0.375538	-2.95301	0.00314688	0.231656
ACTA1	58	actin alpha 1, skeletal muscle	Up in Responder	protein-coding	11.2737	-2.90497	0.86605	-3.35428	0.000795725	0.143317
ABCD2	225	ATP binding cassette subfamily D member 2	Up in Responder	protein-coding	32.5903	-1.09485	0.285274	-3.83791	0.000124088	0.0654654
ANK2	287	ankyrin 2	Up in Responder	protein-coding	188.435	-1.16252	0.415651	-2.79688	0.00515994	0.255623
AIRE	326	autoimmune regulator	Up in Responder	protein-coding	10.6483	-3.88676	1.03692	-3.74837	0.000177985	0.074411
BCL2	596	BCL2 apoptosis regulator	Up in Responder	protein-coding	334.031	-1.57138	0.347232	-4.52546	6.02633e-06	0.0220155
BMP5	653	bone morphogenetic protein 5	Up in Responder	protein-coding	18.8315	-2.58386	0.920934	-2.80569	0.00502083	0.255623
C5	727	complement C5	Up in Responder	protein-coding	99.7612	-1.05714	0.340573	-3.10401	0.00190914	0.196784
ZNHIT2	741	zinc finger HIT-type containing 2	Up in Responder	protein-coding	39.9172	-1.32958	0.464099	-2.86487	0.00417184	0.244908
CD1C	911	CD1c molecule	Up in Responder	protein-coding	21.1263	-1.78621	0.600193	-2.97606	0.00291974	0.22386
CD2	914	CD2 molecule	Up in Responder	protein-coding	38.9186	-1.4139	0.340521	-4.15217	3.29343e-05	0.0306185
CD3G	917	CD3g molecule	Up in Responder	protein-coding	21.7571	-1.42758	0.454156	-3.14337	0.00167014	0.1913
CD247	919	CD247 molecule	Up in Responder	protein-coding	44.4253	-1.55319	0.394482	-3.9373	8.24043e-05	0.052169
CD6	923	CD6 molecule	Up in Responder	protein-coding	88.2353	-1.58294	0.391196	-4.04641	5.2008e-05	0.0403404
CD36	948	CD36 molecule	Up in Responder	protein-coding	281.1	-1.31935	0.460816	-2.86307	0.00419553	0.244908
CEL	1056	carboxyl ester lipase	Up in Responder	protein-coding	45.1898	-1.48847	0.54236	-2.74443	0.00606169	0.267028
CLCN4	1183	chloride voltage-gated channel 4	Up in Responder	protein-coding	64.7022	-1.41965	0.504572	-2.81356	0.00489961	0.254255
CLIC2	1193	chloride intracellular channel 2	Up in Responder	protein-coding	73.7246	-1.26047	0.460232	-2.73878	0.00616678	0.267929
COL19A1	1310	collagen type XIX alpha 1 chain	Up in Responder	protein-coding	26.8743	-2.02449	0.598458	-3.38284	0.000717414	0.143106
CSF2RA	1438	colony stimulating factor 2 receptor subunit alpha	Up in Responder	protein-coding	82.4842	-1.15015	0.365189	-3.14946	0.00163573	0.1913
CYP8B1	1582	cytochrome P450 family 8 subfamily B member 1	Up in Responder	protein-coding	17.1928	-1.43004	0.468521	-3.05224	0.00227137	0.20459
DCT	1638	dopachrome tautomerase	Up in Responder	protein-coding	55.9596	-1.47016	0.568898	-2.58422	0.00975981	0.319908
DMD	1756	dystrophin	Up in Responder	protein-coding	234.572	-1.63312	0.359419	-4.54378	5.52539e-06	0.0220155
DNAH8	1769	dynein axonemal heavy chain 8	Up in Responder	protein-coding	44.5217	-1.52575	0.577151	-2.64359	0.0082031	0.305228
DPP6	1804	dipeptidyl peptidase like 6	Up in Responder	protein-coding	22.2691	-2.23475	0.768933	-2.9063	0.00365736	0.234009
ERBB4	2066	erb-b2 receptor tyrosine kinase 4	Up in Responder	protein-coding	33.8913	-2.12351	0.727855	-2.91749	0.00352858	0.234009
FGF3	2248	fibroblast growth factor 3	Up in Responder	protein-coding	3.12381	-4.44205	1.52012	-2.92217	0.003476	0.233943
FOSB	2354	FosB proto-oncogene, AP-1 transcription factor subunit	Up in Responder	protein-coding	334.126	-1.70548	0.44922	-3.79654	0.000146732	0.0677353
GABRA2	2555	gamma-aminobutyric acid type A receptor subunit alpha2	Up in Responder	protein-coding	13.4466	-2.5753	0.944724	-2.72598	0.00641108	0.271619
GABRD	2563	gamma-aminobutyric acid type A receptor subunit delta	Up in Responder	protein-coding	5.69504	-2.37036	0.909174	-2.60716	0.00912966	0.31315
GABRG3	2567	gamma-aminobutyric acid type A receptor subunit gamma3	Up in Responder	protein-coding	2.63215	-4.90878	1.82405	-2.69115	0.00712068	0.290844
GPLD1	2822	glycosylphosphatidylinositol specific phospholipase D1	Up in Responder	protein-coding	70.9901	-1.07679	0.322407	-3.33983	0.000838288	0.143872
GRIN2A	2903	glutamate ionotropic receptor NMDA type subunit 2A	Up in Responder	protein-coding	85.4083	-2.09437	0.744243	-2.81409	0.00489153	0.254255
HLA-DOB	3112	major histocompatibility complex, class II, DO beta	Up in Responder	protein-coding	30.1207	-1.84927	0.457412	-4.04289	5.27968e-05	0.0403404
IL11RA	3590	interleukin 11 receptor subunit alpha	Up in Responder	protein-coding	120.049	-1.02379	0.357886	-2.86065	0.00422777	0.244908
KCNA2	3737	potassium voltage-gated channel subfamily A member 2	Up in Responder	protein-coding	81.3937	-1.58512	0.50174	-3.15925	0.00158177	0.188917
KCNA3	3738	potassium voltage-gated channel subfamily A member 3	Up in Responder	protein-coding	138.554	-1.11685	0.252127	-4.4297	9.43638e-06	0.0234552
KRTAP5-9	3846	keratin associated protein 5-9	Up in Responder	protein-coding	4.49454	-3.52029	1.27216	-2.76719	0.00565421	0.262619
KRT32	3882	keratin 32	Up in Responder	protein-coding	6.75669	-2.91396	0.958329	-3.04066	0.00236057	0.207561
KRT82	3888	keratin 82	Up in Responder	protein-coding	3.34178	-4.73115	1.33808	-3.53578	0.000406581	0.113786
KRT84	3890	keratin 84	Up in Responder	protein-coding	11.8655	-2.47373	0.887566	-2.78709	0.00531833	0.256182
AFF3	3899	AF4/FMR2 family member 3	Up in Responder	protein-coding	50.7466	-1.10239	0.427873	-2.57644	0.00998229	0.321377
LMO1	4004	LIM domain only 1	Up in Responder	protein-coding	19.0268	-1.89701	0.633907	-2.99257	0.0027664	0.218648
SH2D1A	4068	SH2 domain containing 1A	Up in Responder	protein-coding	23.9271	-1.08257	0.368072	-2.9412	0.00326945	0.233089
MCF2	4168	MCF.2 cell line derived transforming sequence	Up in Responder	protein-coding	8.09279	-2.2913	0.840984	-2.72454	0.00643909	0.271766
MEP1B	4225	meprin A subunit beta	Up in Responder	protein-coding	16.9726	-1.43652	0.549568	-2.61392	0.00895112	0.311854
MGAT3	4248	beta-1,4-mannosyl-glycoprotein 4-beta-N-acetylglucosaminyltransferase	Up in Responder	protein-coding	102.14	-1.38556	0.394513	-3.51209	0.000444598	0.117348
RNR2	4550	l-rRNA	Up in Responder	rRNA	156.095	-1.38181	0.443018	-3.11909	0.0018141	0.193737
MYB	4602	MYB proto-oncogene, transcription factor	Up in Responder	protein-coding	76.9721	-1.46238	0.398071	-3.67367	0.000239088	0.0790704
NEFM	4741	neurofilament medium chain	Up in Responder	protein-coding	17.8757	-2.76038	0.715948	-3.85556	0.000115463	0.0624006
OVGP1	5016	oviductal glycoprotein 1	Up in Responder	protein-coding	17.1377	-1.08698	0.409206	-2.65631	0.00790017	0.301154
PAX3	5077	paired box 3	Up in Responder	protein-coding	15.6765	-1.26895	0.434401	-2.92116	0.00348736	0.233943
SCNN1G	6340	sodium channel epithelial 1 subunit gamma	Up in Responder	protein-coding	40.3088	-1.39157	0.44625	-3.11835	0.00181864	0.193737
SH3GL3	6457	SH3 domain containing GRB2 like 3, endophilin A3	Up in Responder	protein-coding	33.856	-1.78568	0.578049	-3.08914	0.00200734	0.196808
SLC12A3	6559	solute carrier family 12 member 3	Up in Responder	protein-coding	11.067	-1.79329	0.651423	-2.75288	0.00590734	0.265598
SLC17A1	6568	solute carrier family 17 member 1	Up in Responder	protein-coding	13.0157	-2.98878	1.15619	-2.58502	0.00973735	0.319908
SOX10	6663	SRY-box transcription factor 10	Up in Responder	protein-coding	50.2558	-1.19731	0.438473	-2.73063	0.00632127	0.269359
SPRR1A	6698	small proline rich protein 1A	Up in Responder	protein-coding	419.048	-1.24149	0.443497	-2.79931	0.00512121	0.255623
SPRR2B	6701	small proline rich protein 2B	Up in Responder	protein-coding	99.842	-2.07382	0.790869	-2.6222	0.00873638	0.309481
SPRR3	6707	small proline rich protein 3	Up in Responder	protein-coding	342.168	-2.14719	0.59967	-3.58061	0.00034279	0.102643
SYT4	6860	synaptotagmin 4	Up in Responder	protein-coding	1.7247	-3.96509	1.52548	-2.59923	0.00934321	NA
CNTN2	6900	contactin 2	Up in Responder	protein-coding	62.0356	-1.31624	0.448697	-2.93346	0.00335206	0.233089
TRGV5	6978	T cell receptor gamma variable 5	Up in Responder	other	4.97629	-3.51805	1.21361	-2.89883	0.00374562	0.23741
TNF	7124	tumor necrosis factor	Up in Responder	protein-coding	7.48412	-2.0671	0.690025	-2.99569	0.00273829	0.218648
TNNT2	7139	troponin T2, cardiac type	Up in Responder	protein-coding	34.8148	-1.21697	0.416834	-2.91956	0.00350524	0.233943
TTN	7273	titin	Up in Responder	protein-coding	2761.65	-1.0597	0.26634	-3.97874	6.92825e-05	0.0471919
TXK	7294	TXK tyrosine kinase	Up in Responder	protein-coding	43.2224	-1.99926	0.456362	-4.38086	1.18211e-05	0.023812
SLC30A2	7780	solute carrier family 30 member 2	Up in Responder	protein-coding	6.24034	-3.2675	1.11793	-2.92282	0.00346882	0.233943
LHX3	8022	LIM homeobox 3	Up in Responder	protein-coding	8.77956	-3.56052	0.920536	-3.86787	0.000109789	0.0615644
EPX	8288	eosinophil peroxidase	Up in Responder	protein-coding	7.82677	-1.3324	0.481979	-2.76442	0.00570233	0.26265
EOMES	8320	eomesodermin	Up in Responder	protein-coding	21.4304	-1.36075	0.346543	-3.92665	8.61367e-05	0.0530171
IRS4	8471	insulin receptor substrate 4	Up in Responder	protein-coding	34.7084	-3.26627	0.843547	-3.87207	0.000107916	0.0615644
KRT36	8689	keratin 36	Up in Responder	protein-coding	14.7347	-2.49938	0.957332	-2.61078	0.0090336	0.312933
MYOM1	8736	myomesin 1	Up in Responder	protein-coding	52.326	-1.63098	0.511107	-3.19108	0.00141741	0.183568
FCGBP	8857	Fc fragment of IgG binding protein	Up in Responder	protein-coding	392.58	-1.84441	0.428248	-4.30687	1.65583e-05	0.0244599
ENDOU	8909	endonuclease, poly(U) specific	Up in Responder	protein-coding	42.0865	-1.0556	0.386243	-2.73299	0.00627621	0.269359
GPR55	9290	G protein-coupled receptor 55	Up in Responder	protein-coding	25.6716	-1.24004	0.473981	-2.61623	0.00889075	0.311711
ZNF254	9534	zinc finger protein 254	Up in Responder	protein-coding	134.149	-1.03161	0.329795	-3.12803	0.0017598	0.1913
CCDC144A	9720	coiled-coil domain containing 144A	Up in Responder	protein-coding	83.9905	-1.39475	0.347528	-4.01333	5.9867e-05	0.0442178
ARNT2	9915	aryl hydrocarbon receptor nuclear translocator 2	Up in Responder	protein-coding	122.764	-1.3874	0.488013	-2.84295	0.00446978	0.24995
DHRS2	10202	dehydrogenase/reductase 2	Up in Responder	protein-coding	32.8488	-2.45735	0.756712	-3.24741	0.00116462	0.166383
KLRG1	10219	killer cell lectin like receptor G1	Up in Responder	protein-coding	18.1124	-1.26757	0.35603	-3.56029	0.000370444	0.10787
CACNG3	10368	calcium voltage-gated channel auxiliary subunit gamma 3	Up in Responder	protein-coding	3.09286	-4.44768	1.27129	-3.49856	0.000467781	0.119139
CLEC10A	10462	C-type lectin domain containing 10A	Up in Responder	protein-coding	47.9256	-1.27558	0.483133	-2.64023	0.00828493	0.305228
SPINK5	11005	serine peptidase inhibitor Kazal type 5	Up in Responder	protein-coding	892.169	-1.31846	0.421768	-3.12602	0.0017719	0.19152
LILRB4	11006	leukocyte immunoglobulin like receptor B4	Up in Responder	protein-coding	8.70042	-1.96886	0.744077	-2.64604	0.00814408	0.305228
ZPBP	11055	zona pellucida binding protein	Up in Responder	protein-coding	2.96985	-3.99532	1.53083	-2.60992	0.00905646	0.312933
STMN2	11075	stathmin 2	Up in Responder	protein-coding	16.6777	-2.17644	0.624639	-3.48431	0.000493404	0.121958
LDB3	11155	LIM domain binding 3	Up in Responder	protein-coding	34.0118	-1.00357	0.382413	-2.62431	0.00868237	0.30914
CLCA4	22802	chloride channel accessory 4	Up in Responder	protein-coding	143.071	-1.40652	0.502707	-2.79789	0.00514375	0.255623
NTNG1	22854	netrin G1	Up in Responder	protein-coding	25.0259	-1.66196	0.624068	-2.66311	0.00774223	0.300628
FSTL4	23105	follistatin like 4	Up in Responder	protein-coding	57.0562	-1.40729	0.510591	-2.7562	0.00584778	0.265598
SSPOP	23145	SCO-spondin, pseudogene	Up in Responder	pseudo	75.1952	-1.27448	0.406722	-3.13354	0.00172712	0.1913
ACSBG1	23205	acyl-CoA synthetase bubblegum family member 1	Up in Responder	protein-coding	42.6267	-1.82804	0.5139	-3.55718	0.000374851	0.10787
CUX2	23316	cut like homeobox 2	Up in Responder	protein-coding	18.6549	-1.97024	0.685525	-2.87406	0.00405233	0.244259
SMPX	23676	small muscle protein X-linked	Up in Responder	protein-coding	2.96905	-4.39457	1.42379	-3.08653	0.00202507	0.197672
PARM1	25849	prostate androgen-regulated mucin-like protein 1	Up in Responder	protein-coding	265.882	-1.116	0.393622	-2.83521	0.00457949	0.24995
PCDHB5	26167	protocadherin beta 5	Up in Responder	protein-coding	13.6547	-2.24849	0.703441	-3.19641	0.0013915	0.183568
PTPN22	26191	protein tyrosine phosphatase non-receptor type 22	Up in Responder	protein-coding	109.617	-1.20667	0.303539	-3.97533	7.0283e-05	0.0471919
RNU5A-1	26831	RNA, U5A small nuclear 1	Up in Responder	snRNA	15.8756	-1.38424	0.318769	-4.34244	1.40906e-05	0.0244599
HSPB7	27129	heat shock protein family B (small) member 7	Up in Responder	protein-coding	17.7316	-1.56679	0.553838	-2.82897	0.00466985	0.252065
MORC1	27136	MORC family CW-type zinc finger 1	Up in Responder	protein-coding	4.94877	-4.40603	1.26681	-3.47805	0.000505073	0.121958
IL36A	27179	interleukin 36 alpha	Up in Responder	protein-coding	34.4048	-2.09395	0.713748	-2.93373	0.0033491	0.233089
P2RY10	27334	P2Y receptor family member 10	Up in Responder	protein-coding	32.7752	-1.25576	0.376763	-3.33303	0.000859067	0.145307
IGHV3-43	28426	immunoglobulin heavy variable 3-43	Up in Responder	other	6.46988	-1.524	0.58179	-2.6195	0.00880575	0.310375
TRAJ38	28717	T cell receptor alpha joining 38	Up in Responder	other	15.5967	-1.85801	0.680304	-2.73115	0.00631141	0.269359
TRAJ36	28719	T cell receptor alpha joining 36	Up in Responder	other	5.04369	-2.67641	0.715168	-3.74235	0.000182307	0.0748065
TRAJ29	28726	T cell receptor alpha joining 29	Up in Responder	other	3.71619	-2.79218	0.878112	-3.17975	0.001474	0.183568
TRAJ12	28743	T cell receptor alpha joining 12	Up in Responder	other	16.5387	-1.25243	0.4097	-3.05695	0.00223598	0.203888
TRAJ11	28744	T cell receptor alpha joining 11	Up in Responder	other	7.04794	-2.31107	0.664603	-3.47736	0.00050637	0.121958
TRAJ5	28750	T cell receptor alpha joining 5	Up in Responder	other	9.4644	-2.2902	0.652119	-3.51193	0.00044486	0.117348
IGLV3-19	28797	immunoglobulin lambda variable 3-19	Up in Responder	other	53.8793	-1.61742	0.597841	-2.70544	0.00682147	0.281997
IGLV1-50	28821	immunoglobulin lambda variable 1-50 (non-functional)	Up in Responder	other	4.88992	-2.09799	0.734177	-2.8576	0.00426857	0.245468
IGKV3D-7	28877	immunoglobulin kappa variable 3D-7	Up in Responder	other	12.7494	-2.01389	0.738646	-2.72647	0.00640159	0.271619
TBX21	30009	T-box transcription factor 21	Up in Responder	protein-coding	16.4553	-1.6335	0.545851	-2.99257	0.00276644	0.218648
SYCP3	50511	synaptonemal complex protein 3	Up in Responder	protein-coding	23.4594	-1.20952	0.435814	-2.7753	0.005515	0.261047
SSUH2	51066	ssu-2 homolog	Up in Responder	protein-coding	15.377	-1.8225	0.662374	-2.75147	0.0059328	0.265598
GCNT4	51301	glucosaminyl (N-acetyl) transferase 4	Up in Responder	protein-coding	61.0825	-1.38347	0.389632	-3.5507	0.000384203	0.109143
WT1-AS	51352	WT1 antisense RNA	Up in Responder	ncRNA	12.0923	-2.94587	1.0655	-2.76478	0.00569615	0.26265
CD244	51744	CD244 molecule	Up in Responder	protein-coding	14.5299	-1.38605	0.443096	-3.1281	0.00175938	0.1913
CALML5	51806	calmodulin like 5	Up in Responder	protein-coding	691.891	-1.49649	0.433132	-3.45505	0.000550199	0.129695
RNF125	54941	ring finger protein 125	Up in Responder	protein-coding	64.3998	-1.11519	0.343267	-3.24875	0.00115913	0.166383
PIWIL2	55124	piwi like RNA-mediated gene silencing 2	Up in Responder	protein-coding	41.5907	-1.65055	0.58605	-2.8164	0.00485658	0.254255
SLC30A10	55532	solute carrier family 30 member 10	Up in Responder	protein-coding	15.746	-3.1405	1.01862	-3.0831	0.00204857	0.19846
PCDHA2	56146	protocadherin alpha 2	Up in Responder	protein-coding	3.76362	-3.3385	1.02351	-3.26181	0.00110704	0.166078
TDRD1	56165	tudor domain containing 1	Up in Responder	protein-coding	18.7806	-2.44895	0.883481	-2.77193	0.0055725	0.261047
SERTAD4	56256	SERTA domain containing 4	Up in Responder	protein-coding	57.4859	-1.29111	0.489228	-2.63907	0.0083135	0.305228
ERO1B	56605	endoplasmic reticulum oxidoreductase 1 beta	Up in Responder	protein-coding	152.595	-1.08066	0.333536	-3.24	0.00119531	0.166568
TCIM	56892	transcriptional and immune response regulator	Up in Responder	protein-coding	137.482	-1.71883	0.54103	-3.17695	0.00148833	0.184237
RNF150	57484	ring finger protein 150	Up in Responder	protein-coding	164.744	-1.96312	0.525475	-3.73589	0.000187052	0.0749702
TNN	63923	tenascin N	Up in Responder	protein-coding	21.0248	-1.73704	0.668291	-2.59923	0.00934323	0.316556
SLC28A3	64078	solute carrier family 28 member 3	Up in Responder	protein-coding	231.095	-1.12288	0.40159	-2.79609	0.00517249	0.255623
SMOC1	64093	SPARC related modular calcium binding 1	Up in Responder	protein-coding	13.6307	-1.63564	0.596922	-2.74013	0.00614142	0.267913
LMF1	64788	lipase maturation factor 1	Up in Responder	protein-coding	125.585	-1.12368	0.306733	-3.66338	0.000248907	0.080805
FAM124B	79843	family with sequence similarity 124 member B	Up in Responder	protein-coding	16.3775	-1.75083	0.622241	-2.81376	0.0048966	0.254255
MAB21L4	79919	mab-21 like 4	Up in Responder	protein-coding	102.49	-1.22458	0.366643	-3.33999	0.000837819	0.143872
NANOG	79923	Nanog homeobox	Up in Responder	protein-coding	7.78917	-2.8278	0.822773	-3.43691	0.000588388	0.137237
CCDC170	80129	coiled-coil domain containing 170	Up in Responder	protein-coding	32.8369	-1.21396	0.447952	-2.71002	0.00672793	0.278649
TLR10	81793	toll like receptor 10	Up in Responder	protein-coding	31.7403	-1.76858	0.481104	-3.67609	0.00023684	0.0790704
SLCO5A1	81796	solute carrier organic anion transporter family member 5A1	Up in Responder	protein-coding	52.9364	-1.36459	0.503372	-2.71091	0.00670997	0.278426
CHST9	83539	carbohydrate sulfotransferase 9	Up in Responder	protein-coding	16.873	-2.1962	0.670452	-3.2757	0.001054	0.162185
CALN1	83698	calneuron 1	Up in Responder	protein-coding	22.5933	-1.77704	0.672219	-2.64354	0.00820446	0.305228
ATP13A4	84239	ATPase 13A4	Up in Responder	protein-coding	200.503	-1.26507	0.415878	-3.04192	0.00235074	0.207521
GPR174	84636	G protein-coupled receptor 174	Up in Responder	protein-coding	15.9202	-1.46233	0.520803	-2.80784	0.00498755	0.255623
SNORD14B	85388	small nucleolar RNA, C/D box 14B	Up in Responder	snoRNA	10.5793	-1.4673	0.550924	-2.66334	0.007737	0.300628
MLIP	90523	muscular LMNA interacting protein	Up in Responder	protein-coding	22.8037	-1.5837	0.544717	-2.90738	0.00364471	0.234009
L3MBTL4	91133	L3MBTL histone methyl-lysine binding protein 4	Up in Responder	protein-coding	170.043	-1.2302	0.462135	-2.662	0.00776785	0.300628
GGTLC2	91227	gamma-glutamyltransferase light chain 2	Up in Responder	protein-coding	4.348	-3.16439	1.19427	-2.64964	0.00805767	0.304679
PKHD1L1	93035	PKHD1 like 1	Up in Responder	protein-coding	68.4969	-1.36419	0.469491	-2.90567	0.00366464	0.234009
SYCE1	93426	synaptonemal complex central element protein 1	Up in Responder	protein-coding	6.49164	-2.4961	0.865759	-2.88313	0.0039374	0.241838
MGAM2	93432	maltase-glucoamylase 2 (putative)	Up in Responder	protein-coding	23.3182	-2.23648	0.7179	-3.11531	0.00183752	0.193828
STX1B	112755	syntaxin 1B	Up in Responder	protein-coding	57.2995	-1.15629	0.426454	-2.7114	0.00670007	0.278426
PGLYRP2	114770	peptidoglycan recognition protein 2	Up in Responder	protein-coding	5.87234	-1.95223	0.743961	-2.62411	0.00868767	0.30914
NOSTRIN	115677	nitric oxide synthase trafficking	Up in Responder	protein-coding	32.2231	-1.48369	0.410018	-3.61861	0.000296194	0.0911536
ASCL4	121549	achaete-scute family bHLH transcription factor 4	Up in Responder	protein-coding	2.60183	-3.62975	1.28897	-2.81601	0.00486241	0.254255
ZNF831	128611	zinc finger protein 831	Up in Responder	protein-coding	129.015	-1.06837	0.258727	-4.12933	3.63823e-05	0.0310061
ENPP6	133121	ectonucleotide pyrophosphatase/phosphodiesterase 6	Up in Responder	protein-coding	16.1485	-2.64392	0.865418	-3.05507	0.00225005	0.204284
RALYL	138046	RALY RNA binding protein like	Up in Responder	protein-coding	3.39255	-3.5357	1.19337	-2.96279	0.00304867	0.22745
ZNF280B	140883	zinc finger protein 280B	Up in Responder	protein-coding	9.06774	-2.30674	0.734754	-3.13948	0.0016925	0.1913
SYT9	143425	synaptotagmin 9	Up in Responder	protein-coding	34.1629	-1.0552	0.364638	-2.89385	0.00380555	0.237531
PGPEP1L	145814	pyroglutamyl-peptidase I like	Up in Responder	protein-coding	3.8365	-2.74114	0.899612	-3.04702	0.00231122	0.2065
CARMIL2	146206	capping protein regulator and myosin 1 linker 2	Up in Responder	protein-coding	74.434	-1.03245	0.360761	-2.86187	0.00421154	0.244908
VSIG10L	147645	V-set and immunoglobulin domain containing 10 like	Up in Responder	protein-coding	175.698	-1.27894	0.39071	-3.27337	0.00106275	0.162356
DCST1	149095	DC-STAMP domain containing 1	Up in Responder	protein-coding	48.8268	-1.09483	0.395763	-2.76638	0.00566831	0.262619
PYHIN1	149628	pyrin and HIN domain family member 1	Up in Responder	protein-coding	35.428	-1.27334	0.415203	-3.06679	0.00216369	0.201046
RIMBP3C	150221	RIMS binding protein 3C	Up in Responder	protein-coding	4.2633	-2.4818	0.860865	-2.88291	0.00394017	0.241838
SILC1	150622	sciatic injury induced lincRNA upregulator of SOX11	Up in Responder	ncRNA	14.5684	-2.79269	0.933619	-2.99126	0.00277832	0.218648
KLB	152831	klotho beta	Up in Responder	protein-coding	74.0313	-1.29169	0.342789	-3.76817	0.00016445	0.0728776
DOCK8-AS1	157983	DOCK8 antisense RNA 1	Up in Responder	ncRNA	11.1565	-1.73799	0.674434	-2.57696	0.00996748	0.321377
AK8	158067	adenylate kinase 8	Up in Responder	protein-coding	19.6518	-1.79044	0.603336	-2.96757	0.00300162	0.226996
SPRR4	163778	small proline rich protein 4	Up in Responder	protein-coding	13.5696	-1.74377	0.656282	-2.65705	0.00788279	0.301154
ZNF366	167465	zinc finger protein 366	Up in Responder	protein-coding	81.9334	-1.11774	0.303041	-3.68841	0.000225664	0.0790704
GALNTL5	168391	polypeptide N-acetylgalactosaminyltransferase like 5	Up in Responder	protein-coding	3.76145	-3.93246	1.4488	-2.7143	0.00664168	0.27715
PKD1L1	168507	polycystin 1 like 1, transient receptor potential channel interacting	Up in Responder	protein-coding	51.7755	-1.06711	0.357756	-2.98279	0.0028563	0.2206
SYNPO2	171024	synaptopodin 2	Up in Responder	protein-coding	578.245	-1.78399	0.402921	-4.42764	9.52688e-06	0.0234552
KRT78	196374	keratin 78	Up in Responder	protein-coding	221.424	-1.3869	0.492479	-2.81616	0.0048602	0.254255
NLRC3	197358	NLR family CARD domain containing 3	Up in Responder	protein-coding	166.163	-1.1267	0.265931	-4.2368	2.26724e-05	0.0279097
NIBAN3	199786	niban apoptosis regulator 3	Up in Responder	protein-coding	21.358	-1.39932	0.446613	-3.13319	0.00172915	0.1913
LRRC55	219527	leucine rich repeat containing 55	Up in Responder	protein-coding	40.403	-2.588	0.697273	-3.7116	0.000205956	0.0760595
PI16	221476	peptidase inhibitor 16	Up in Responder	protein-coding	31.4591	-1.95393	0.660837	-2.95675	0.003109	0.230225
RSPH10B	222967	radial spoke head 10 homolog B	Up in Responder	protein-coding	27.4458	-1.27379	0.422302	-3.01629	0.00255888	0.213175
SCML4	256380	Scm polycomb group protein like 4	Up in Responder	protein-coding	58.6123	-1.12922	0.364652	-3.09671	0.00195684	0.196808
LINC00907	284260	long intergenic non-protein coding RNA 907	Up in Responder	ncRNA	17.7114	-2.18931	0.71097	-3.07934	0.00207462	0.19846
LINC00908	284276	long intergenic non-protein coding RNA 908	Up in Responder	ncRNA	4.22239	-3.02257	0.862903	-3.5028	0.000460403	0.118635
MED15P9	285103	mediator complex subunit 15 pseudogene 9	Up in Responder	pseudo	9.40076	-4.13918	1.43697	-2.88049	0.00397061	0.242371
EPHA6	285220	EPH receptor A6	Up in Responder	protein-coding	30.081	-2.31012	0.695176	-3.32307	0.000890315	0.148328
CRB2	286204	crumbs cell polarity complex component 2	Up in Responder	protein-coding	51.2939	-2.04643	0.535368	-3.82247	0.000132119	0.066534
P2RY8	286530	P2Y receptor family member 8	Up in Responder	protein-coding	62.8263	-1.10606	0.265641	-4.16374	3.13073e-05	0.0306185
RAB43	339122	RAB43, member RAS oncogene family	Up in Responder	protein-coding	21.6853	-1.54415	0.540505	-2.85686	0.0042786	0.245468
AGBL3	340351	AGBL carboxypeptidase 3	Up in Responder	protein-coding	60.2295	-1.10129	0.333351	-3.30369	0.00095421	0.152977
EZHIP	340602	EZH inhibitory protein	Up in Responder	protein-coding	1.93131	-4.12453	1.3213	-3.12158	0.00179883	NA
TUBB8	347688	tubulin beta 8 class VIII	Up in Responder	protein-coding	9.96447	-2.81858	0.87041	-3.23822	0.00120276	0.166568
INSYN1	388135	inhibitory synaptic factor 1	Up in Responder	protein-coding	41.2939	-2.21128	0.570926	-3.87315	0.000107439	0.0615644
SPDYE4	388333	speedy/RINGO cell cycle regulator family member E4	Up in Responder	protein-coding	11.531	-2.34866	0.631484	-3.71927	0.000199797	0.0750358
C1orf146	388649	chromosome 1 open reading frame 146	Up in Responder	protein-coding	10.0462	-2.07099	0.687012	-3.01449	0.00257408	0.213175
SAMD5	389432	sterile alpha motif domain containing 5	Up in Responder	protein-coding	85.6825	-1.36674	0.366954	-3.72455	0.000195666	0.0749702
SPATA31A6	389730	SPATA31 subfamily A member 6	Up in Responder	protein-coding	4.42877	-3.95805	1.41277	-2.80163	0.00508456	0.255623
ZNF793	390927	zinc finger protein 793	Up in Responder	protein-coding	122.774	-1.08243	0.373625	-2.8971	0.00376628	0.23741
ANKRD20A19P	400110	ankyrin repeat domain 20 family member A19, pseudogene	Up in Responder	pseudo	6.56239	-2.26205	0.812339	-2.78461	0.00535924	0.256917
LINC00885	401109	long intergenic non-protein coding RNA 885	Up in Responder	ncRNA	34.6208	-1.94464	0.553177	-3.5154	0.000439088	0.117348
ZNF658B	401509	zinc finger protein 658B (pseudogene)	Up in Responder	pseudo	32.7983	-1.03988	0.333174	-3.12112	0.00180164	0.193737
KPNA7	402569	karyopherin subunit alpha 7	Up in Responder	protein-coding	17.2674	-1.321	0.480437	-2.74959	0.00596703	0.265598
GRIFIN	402635	galectin-related inter-fiber protein	Up in Responder	protein-coding	4.71254	-2.26754	0.823794	-2.75256	0.00591311	0.265598
IGLON5	402665	IgLON family member 5	Up in Responder	protein-coding	67.6813	-1.33526	0.442829	-3.0153	0.00256723	0.213175
MIRLET7I	406891	microRNA let-7i	Up in Responder	ncRNA	15.6597	-1.96602	0.534073	-3.68119	0.000232148	0.0790704
IFIT1B	439996	interferon induced protein with tetratricopeptide repeats 1B	Up in Responder	protein-coding	13.8149	-2.41509	0.709123	-3.40574	0.000659847	0.143106
CARD17	440068	caspase recruitment domain family member 17	Up in Responder	protein-coding	14.2146	-1.65722	0.642928	-2.57762	0.00994834	0.321377
LOC440896	440896	uncharacterized LOC440896	Up in Responder	ncRNA	11.3477	-2.93693	0.872235	-3.36713	0.000759554	0.143106
LINC02487	441178	long intergenic non-protein coding RNA 2487	Up in Responder	ncRNA	26.1157	-2.62652	0.866066	-3.03271	0.00242371	0.207975
LOC441666	441666	zinc finger protein 91 pseudogene	Up in Responder	pseudo	22.6276	-1.63537	0.620136	-2.63711	0.00836148	0.305228
TARP	445347	TCR gamma alternate reading frame protein	Up in Responder	protein-coding	8.49863	-1.68562	0.652264	-2.58426	0.00975871	0.319908
PJVK	494513	pejvakin	Up in Responder	protein-coding	40.3197	-1.18848	0.386871	-3.07204	0.00212602	0.201046
CT45A1	541466	cancer/testis antigen family 45 member A1	Up in Responder	protein-coding	4.98721	-5.07579	1.73806	-2.92038	0.00349609	0.233943
LIPN	643418	lipase family member N	Up in Responder	protein-coding	39.706	-1.82105	0.603102	-3.01947	0.00253219	0.213175
TMEM200C	645369	transmembrane protein 200C	Up in Responder	protein-coding	24.6341	-1.73437	0.621907	-2.7888	0.00529044	0.256182
RNF225	646862	ring finger protein 225	Up in Responder	protein-coding	67.3806	-1.07291	0.378111	-2.83755	0.0045461	0.24995
ZNF732	654254	zinc finger protein 732	Up in Responder	protein-coding	28.4184	-1.54475	0.599656	-2.57607	0.00999318	0.321377
RSPH10B2	728194	radial spoke head 10 homolog B2	Up in Responder	protein-coding	10.9104	-1.58217	0.542926	-2.91415	0.0035666	0.234009
GTF2IRD1P1	729156	GTF2I repeat domain containing 1 pseudogene 1	Up in Responder	pseudo	7.10035	-2.90625	0.980629	-2.96365	0.0030401	0.22745
AACSP1	729522	acetoacetyl-CoA synthetase pseudogene 1	Up in Responder	pseudo	18.491	-2.08573	0.662086	-3.15024	0.00163135	0.1913
CCDC175	729665	coiled-coil domain containing 175	Up in Responder	protein-coding	10.6518	-2.88242	0.932706	-3.09039	0.00199897	0.196808
TBC1D3	729873	TBC1 domain family member 3	Up in Responder	protein-coding	7.41904	-1.42442	0.517843	-2.75068	0.00594709	0.265598
LOC100128288	100128288	uncharacterized LOC100128288	Up in Responder	ncRNA	19.6572	-1.23862	0.368294	-3.36313	0.000770649	0.143106
HSFX2	100130086	heat shock transcription factor family, X-linked 2	Up in Responder	protein-coding	12.8623	-2.31796	0.790271	-2.93312	0.00335569	0.233089
LINC00861	100130231	long intergenic non-protein coding RNA 861	Up in Responder	ncRNA	93.9462	-1.50112	0.306339	-4.9002	9.57385e-07	0.00707124
LOC100130370	100130370	uncharacterized LOC100130370	Up in Responder	ncRNA	17.3932	-1.28145	0.432362	-2.96383	0.00303838	0.22745
TRX-CAT1-7	100189315	tRNA-iMet (anticodon CAT) 1-7	Up in Responder	tRNA	2.81825	-2.55388	0.869137	-2.93841	0.00329901	0.233089
LINC00173	100287569	long intergenic non-protein coding RNA 173	Up in Responder	ncRNA	43.7237	-1.61504	0.463741	-3.48263	0.000496519	0.121958
ITGB2-AS1	100505746	ITGB2 antisense RNA 1	Up in Responder	ncRNA	40.9158	-1.36843	0.392512	-3.48633	0.000489689	0.121958
LOC100506606	100506606	uncharacterized LOC100506606	Up in Responder	ncRNA	36.1124	-1.44671	0.441172	-3.27923	0.0010409	0.161289
MKLN1-AS	100506881	MKLN1 antisense RNA	Up in Responder	ncRNA	14.5578	-1.09745	0.384234	-2.85622	0.00428721	0.245468
LRRC37A8P	100533789	leucine rich repeat containing 37 member A8, pseudogene	Up in Responder	pseudo	2.53181	-3.20777	0.853267	-3.7594	0.000170321	0.0738931
RNU6-57P	100873765	RNA, U6 small nuclear 57, pseudogene	Up in Responder	pseudo	5.95857	-1.95089	0.679058	-2.87293	0.00406679	0.244259
LINC01505	100996590	long intergenic non-protein coding RNA 1505	Up in Responder	ncRNA	4.23477	-2.7722	1.04245	-2.65931	0.00783003	0.301154
NA	101926997	NA	Up in Responder	NA	15.7966	-1.63007	0.517763	-3.1483	0.00164222	0.1913
L3MBTL4-AS1	101927150	L3MBTL4 antisense RNA 1	Up in Responder	ncRNA	13.9212	-1.4594	0.546386	-2.671	0.00756261	0.300628
NA	101927376	NA	Up in Responder	NA	10.2987	-1.85093	0.669203	-2.76587	0.00567716	0.262619
LOC101927789	101927789	FAU, ubiquitin like and ribosomal protein S30 fusion pseudogene	Up in Responder	pseudo	41.907	-1.19393	0.444791	-2.68425	0.00726937	0.295008
LOC101927870	101927870	uncharacterized LOC101927870	Up in Responder	ncRNA	10.6939	-3.24165	1.05781	-3.0645	0.00218033	0.201046
LINC01285	101928287	long intergenic non-protein coding RNA 1285	Up in Responder	ncRNA	2.28862	-3.83327	1.408	-2.7225	0.00647906	0.272933
SIRPG-AS1	101929010	SIRPG antisense RNA 1	Up in Responder	ncRNA	15.4682	-1.34153	0.500261	-2.68166	0.0073257	0.295685
LINC01859	101929164	long intergenic non-protein coding RNA 1859	Up in Responder	ncRNA	5.73569	-5.45145	1.69619	-3.21393	0.0013093	0.176899
LOC101929572	101929572	uncharacterized LOC101929572	Up in Responder	ncRNA	1.96692	-3.32064	1.06853	-3.10766	0.00188573	NA
LOC101930071	101930071	uncharacterized LOC101930071	Up in Responder	ncRNA	9.63181	-1.59714	0.584302	-2.73342	0.00626803	0.269359
TTC39C-AS1	102724246	TTC39C antisense RNA 1	Up in Responder	ncRNA	18.7085	-1.95843	0.525299	-3.72821	0.000192845	0.0749702
NIPAL4-DT	102724404	NIPAL4 divergent transcript	Up in Responder	ncRNA	23.4817	-1.78051	0.594057	-2.9972	0.00272474	0.218648
LINC01391	103344930	long intergenic non-protein coding RNA 1391	Up in Responder	ncRNA	6.7323	-2.15718	0.783077	-2.75475	0.0058737	0.265598
LOC105369209	105369209	uncharacterized LOC105369209	Up in Responder	ncRNA	5.69447	-2.63634	0.941497	-2.80016	0.00510777	0.255623
NA	105375678	NA	Up in Responder	NA	4.02742	-3.16952	1.21967	-2.59867	0.00935857	0.31658
LOC105377310	105377310	syncytin-1-like	Up in Responder	protein-coding	14.3443	-1.33216	0.49697	-2.68056	0.00734984	0.296105
LOC105378948	105378948	uncharacterized LOC105378948	Up in Responder	ncRNA	20.5998	-1.72487	0.65514	-2.63283	0.00846774	0.305487
SERPINA3	12	serpin family A member 3	Down in Responder	protein-coding	81.7399	2.01772	0.618913	3.26009	0.00111376	0.166078
ASIC1	41	acid sensing ion channel subunit 1	Down in Responder	protein-coding	33.7417	1.17833	0.410158	2.87287	0.00406767	0.244259
ADRA2C	152	adrenoceptor alpha 2C	Down in Responder	protein-coding	6.66817	2.25528	0.770129	2.92845	0.00340657	0.233693
CSF3	1440	colony stimulating factor 3	Down in Responder	protein-coding	25.9638	2.38157	0.662211	3.5964	0.000322656	0.0979371
F3	2152	coagulation factor III, tissue factor	Down in Responder	protein-coding	522.126	1.58726	0.366807	4.32724	1.50989e-05	0.0244599
FN1	2335	fibronectin 1	Down in Responder	protein-coding	4998.51	1.20196	0.36336	3.30792	0.000939929	0.152977
GATA1	2623	GATA binding protein 1	Down in Responder	protein-coding	6.67021	2.28001	0.645942	3.52975	0.000415952	0.113786
IL1B	3553	interleukin 1 beta	Down in Responder	protein-coding	162.419	1.36171	0.451192	3.01802	0.00254434	0.213175
INHBA	3624	inhibin subunit beta A	Down in Responder	protein-coding	201.945	1.11206	0.422705	2.63081	0.00851808	0.305905
KRT18	3875	keratin 18	Down in Responder	protein-coding	137.091	1.09455	0.42413	2.5807	0.00986002	0.320679
LAMB3	3914	laminin subunit beta 3	Down in Responder	protein-coding	1267.95	1.02226	0.308902	3.30934	0.000935156	0.152977
LAMC2	3918	laminin subunit gamma 2	Down in Responder	protein-coding	2428.17	1.07133	0.365399	2.93195	0.0033684	0.233241
LIF	3976	LIF interleukin 6 family cytokine	Down in Responder	protein-coding	101.462	1.07696	0.395675	2.72183	0.00649213	0.272965
MFAP2	4237	microfibril associated protein 2	Down in Responder	protein-coding	79.1858	1.12019	0.344437	3.25222	0.00114505	0.166383
MT2A	4502	metallothionein 2A	Down in Responder	protein-coding	127.451	1.2295	0.422828	2.90779	0.00363993	0.234009
GADD45B	4616	growth arrest and DNA damage inducible beta	Down in Responder	protein-coding	113.231	1.41157	0.333161	4.23691	2.26617e-05	0.0279097
SERPINE1	5054	serpin family E member 1	Down in Responder	protein-coding	247.647	1.12369	0.425444	2.64121	0.00826094	0.305228
PRB1	5542	proline rich protein BstNI subfamily 1	Down in Responder	protein-coding	11.8724	3.12094	0.846971	3.68482	0.000228864	0.0790704
PRB3	5544	proline rich protein BstNI subfamily 3	Down in Responder	protein-coding	2.30692	2.37865	0.790472	3.00915	0.00261975	0.213414
PTGS2	5743	prostaglandin-endoperoxide synthase 2	Down in Responder	protein-coding	132.446	1.24856	0.474309	2.63238	0.00847886	0.305487
PTPRH	5794	protein tyrosine phosphatase receptor type H	Down in Responder	protein-coding	88.7316	1.39603	0.468044	2.98269	0.00285731	0.2206
RRAD	6236	RRAD, Ras related glycolysis inhibitor and calcium channel regulator	Down in Responder	protein-coding	27.4112	1.74183	0.63046	2.76279	0.00573091	0.26265
S100A2	6273	S100 calcium binding protein A2	Down in Responder	protein-coding	3380.72	1.01271	0.327786	3.08953	0.00200471	0.196808
SLC11A1	6556	solute carrier family 11 member 1	Down in Responder	protein-coding	107.131	1.13074	0.335179	3.37353	0.000742112	0.143106
TAGLN	6876	transgelin	Down in Responder	protein-coding	394.687	1.03253	0.38213	2.70203	0.0068918	0.284373
TGM2	7052	transglutaminase 2	Down in Responder	protein-coding	292.046	1.07077	0.357835	2.99237	0.00276824	0.218648
TPM2	7169	tropomyosin 2	Down in Responder	protein-coding	399.97	1.31799	0.344463	3.82622	0.000130125	0.066534
SCARF1	8578	scavenger receptor class F member 1	Down in Responder	protein-coding	38.1551	1.04743	0.383037	2.73455	0.00624654	0.269359
TNFRSF10C	8794	TNF receptor superfamily member 10c	Down in Responder	protein-coding	17.3822	1.27588	0.46821	2.72501	0.00642997	0.271766
SOCS3	9021	suppressor of cytokine signaling 3	Down in Responder	protein-coding	602.358	1.04675	0.29636	3.53202	0.000412393	0.113786
GPC6	10082	glypican 6	Down in Responder	protein-coding	65.023	1.13383	0.414097	2.73807	0.0061801	0.267982
FSTL3	10272	follistatin like 3	Down in Responder	protein-coding	224.357	1.06172	0.316513	3.35443	0.000795291	0.143317
CORO2B	10391	coronin 2B	Down in Responder	protein-coding	25.3275	1.57884	0.503494	3.13577	0.00171405	0.1913
MYL9	10398	myosin light chain 9	Down in Responder	protein-coding	348.399	1.05388	0.371651	2.83567	0.00457291	0.24995
FST	10468	follistatin	Down in Responder	protein-coding	163.058	1.05849	0.349454	3.02898	0.00245381	0.209121
PROCR	10544	protein C receptor	Down in Responder	protein-coding	65.1984	1.08299	0.240929	4.49506	6.95499e-06	0.0220155
CXCL13	10563	C-X-C motif chemokine ligand 13	Down in Responder	protein-coding	59.6108	1.22515	0.47511	2.57867	0.00991829	0.321377
ERN2	10595	endoplasmic reticulum to nucleus signaling 2	Down in Responder	protein-coding	32.8363	1.90103	0.736612	2.58078	0.0098577	0.320679
ADAMTS7	11173	ADAM metallopeptidase with thrombospondin type 1 motif 7	Down in Responder	protein-coding	87.0303	1.0434	0.39191	2.66235	0.00775967	0.300628
SAMD4A	23034	sterile alpha motif domain containing 4A	Down in Responder	protein-coding	272.455	1.06335	0.318567	3.33792	0.000844089	0.143872
TPSD1	23430	tryptase delta 1	Down in Responder	protein-coding	3.86152	2.44958	0.792061	3.09267	0.00198363	0.196808
FJX1	24147	four-jointed box kinase 1	Down in Responder	protein-coding	40.5589	1.39851	0.429322	3.25748	0.00112407	0.166078
TMEM158	25907	transmembrane protein 158	Down in Responder	protein-coding	26.749	1.70783	0.507744	3.36357	0.000769414	0.143106
OPLAH	26873	5-oxoprolinase, ATP-hydrolysing	Down in Responder	protein-coding	109.089	1.18801	0.382112	3.10907	0.00187678	0.196159
CSDC2	27254	cold shock domain containing C2	Down in Responder	protein-coding	35.1864	1.61486	0.438426	3.68331	0.000230223	0.0790704
G0S2	50486	G0/G1 switch 2	Down in Responder	protein-coding	58.4499	1.54326	0.484674	3.18412	0.00145196	0.183568
TNFRSF12A	51330	TNF receptor superfamily member 12A	Down in Responder	protein-coding	82.5747	1.07764	0.27286	3.94941	7.83424e-05	0.0510562
A4GALT	53947	alpha 1,4-galactosyltransferase (P blood group)	Down in Responder	protein-coding	216.796	1.00808	0.345924	2.91417	0.00356639	0.234009
C19orf73	55150	chromosome 19 open reading frame 73	Down in Responder	protein-coding	5.45431	2.21562	0.751664	2.94763	0.00320222	0.233089
TRIM39	56658	tripartite motif containing 39	Down in Responder	protein-coding	10.4128	1.33814	0.477059	2.80497	0.00503215	0.255623
HES4	57801	hes family bHLH transcription factor 4	Down in Responder	protein-coding	60.0779	1.21256	0.39041	3.10586	0.00189727	0.196784
ROBO3	64221	roundabout guidance receptor 3	Down in Responder	protein-coding	67.2516	1.0075	0.365423	2.75708	0.00583203	0.265598
AMN	81693	amnion associated transmembrane protein	Down in Responder	protein-coding	72.869	2.03887	0.527535	3.86489	0.000111137	0.0615644
RILP	83547	Rab interacting lysosomal protein	Down in Responder	protein-coding	10.031	1.24048	0.478826	2.59066	0.0095791	0.319418
MON1A	84315	MON1 homolog A, secretory trafficking associated	Down in Responder	protein-coding	37.3842	1.02991	0.311896	3.3021	0.000959642	0.152977
ZNF628	89887	zinc finger protein 628	Down in Responder	protein-coding	38.6685	1.13078	0.33989	3.32689	0.000878206	0.147419
SYT8	90019	synaptotagmin 8	Down in Responder	protein-coding	90.3775	2.42606	0.635999	3.81456	0.000136427	0.0667115
MYLK3	91807	myosin light chain kinase 3	Down in Responder	protein-coding	22.3974	1.70475	0.621593	2.74255	0.00609648	0.267913
TMEM88	92162	transmembrane protein 88	Down in Responder	protein-coding	13.8705	1.27459	0.477037	2.67189	0.00754261	0.300628
PPP1R14A	94274	protein phosphatase 1 regulatory inhibitor subunit 14A	Down in Responder	protein-coding	17.5974	1.79193	0.526847	3.40124	0.000670811	0.143106
LRG1	116844	leucine rich alpha-2-glycoprotein 1	Down in Responder	protein-coding	38.6198	1.66864	0.548212	3.04379	0.00233615	0.207057
ADAMTS14	140766	ADAM metallopeptidase with thrombospondin type 1 motif 14	Down in Responder	protein-coding	282.114	1.06774	0.322959	3.30612	0.000945968	0.152977
CMTM2	146225	CKLF like MARVEL transmembrane domain containing 2	Down in Responder	protein-coding	11.5189	1.49136	0.543387	2.74456	0.00605924	0.267028
GLIS1	148979	GLIS family zinc finger 1	Down in Responder	protein-coding	33.1604	1.75509	0.460672	3.80986	0.000139045	0.0667115
SHISA4	149345	shisa family member 4	Down in Responder	protein-coding	21.7537	1.38396	0.48884	2.83112	0.0046386	0.251917
CCDC116	164592	coiled-coil domain containing 116	Down in Responder	protein-coding	12.593	2.28694	0.724003	3.15875	0.00158448	0.188917
ASPHD1	253982	aspartate beta-hydroxylase domain containing 1	Down in Responder	protein-coding	24.6554	1.7034	0.602209	2.82858	0.00467545	0.252065
COL24A1	255631	collagen type XXIV alpha 1 chain	Down in Responder	protein-coding	58.3738	1.05286	0.332675	3.16483	0.00155173	0.187887
LINC01019	285577	long intergenic non-protein coding RNA 1019	Down in Responder	ncRNA	2.15209	4.13961	1.51591	2.73078	0.00631849	0.269359
RBPMS2	348093	RNA binding protein, mRNA processing factor 2	Down in Responder	protein-coding	23.3573	1.38232	0.499198	2.76909	0.00562135	0.262227
FAM131C	348487	family with sequence similarity 131 member C	Down in Responder	protein-coding	8.91896	2.27741	0.85146	2.67471	0.00747942	0.299691
LCE3C	353144	late cornified envelope 3C	Down in Responder	protein-coding	4.02366	3.87314	1.36388	2.8398	0.00451416	0.24995
C11orf96	387763	chromosome 11 open reading frame 96	Down in Responder	protein-coding	53.3867	1.28057	0.490969	2.60826	0.00910045	0.312933
LINC02875	388407	long intergenic non-protein coding RNA 2875	Down in Responder	ncRNA	14.329	2.10335	0.739982	2.84243	0.00447711	0.24995
FEZF1	389549	FEZ family zinc finger 1	Down in Responder	protein-coding	16.6518	2.04991	0.781935	2.62159	0.00875214	0.309481
LINC01002	399844	long intergenic non-protein coding RNA 1002	Down in Responder	ncRNA	56.4968	1.26492	0.483748	2.61484	0.00892699	0.311854
LOC100133920	100133920	methylenetetrahydrofolate dehydrogenase (NADP+ dependent) 1 like pseudogene	Down in Responder	pseudo	1.58672	2.9521	1.05168	2.80703	0.005	NA
MANCR	100216001	mitotically associated long non coding RNA	Down in Responder	ncRNA	3.32469	2.42939	0.725596	3.34813	0.000813586	0.143317
MIR1180	100302256	microRNA 1180	Down in Responder	ncRNA	3.0134	3.65608	1.0687	3.42104	0.000623817	0.1425
LOC100505918	100505918	uncharacterized LOC100505918	Down in Responder	ncRNA	12.951	2.13493	0.765802	2.78784	0.00530607	0.256182
SLX1A-SULT1A3	100526830	SLX1A-SULT1A3 readthrough (NMD candidate)	Down in Responder	ncRNA	205.374	1.1201	0.392869	2.85108	0.00435704	0.248183
TEN1-CDK3	100529145	TEN1-CDK3 readthrough (NMD candidate)	Down in Responder	ncRNA	45.7096	1.03214	0.395721	2.60824	0.00910082	0.312933
MIR4489	100616284	microRNA 4489	Down in Responder	ncRNA	2.72723	2.24875	0.866203	2.5961	0.00942892	0.316811
RALY-AS1	101926888	RALY antisense RNA 1	Down in Responder	ncRNA	17.3128	1.31498	0.465648	2.82398	0.00474307	0.253563
RNU6-2	103625684	RNA, U6 small nuclear 2	Down in Responder	snRNA	9.9983	1.28206	0.489987	2.61652	0.00888306	0.311711
LINC01322	103695433	long intergenic non-protein coding RNA 1322	Down in Responder	ncRNA	3.84035	4.25605	1.34376	3.16726	0.00153881	0.18768
SEPTIN9-DT	105371907	SEPTIN9 divergent transcript	Down in Responder	ncRNA	44.0734	1.0597	0.405591	2.61273	0.00898225	0.312447
NA	105373256	NA	Down in Responder	NA	5.2569	2.28992	0.780512	2.93387	0.00334768	0.233089
NA	105376779	NA	Down in Responder	NA	64.1582	1.08802	0.386105	2.81794	0.00483325	0.254255
